# Supplementary material for: Electrical and Structural Properties of Li1.3Al0.3Ti1.7(PO4)3—Based Ceramics Prepared with the Addition of Li4SiO4
Source: MDPI journal article supplement (doi:10.3390/ma14195729), 2021-09-30
Supplement: s1 [file s1]

Supplementary

# Supplementary Material for Electrical and Structural Properties of $\text{Li}_{1.3}\text{Al}_{0.3}\text{Ti}_{1.7}(\text{PO}_4)_3$ -Based Ceramics Prepared with the Addition of $\text{Li}_4\text{SiO}_4$

Konrad Kwatek <sup>1,\*</sup>, Wioleta Ślubowska <sup>1</sup>, Jan Nowiński <sup>1</sup>, Agnieszka Krawczyńska <sup>2</sup>, Isabel Sobrados <sup>3</sup> and Jesús Sanz <sup>3</sup>

<sup>1</sup> Faculty of Physics, Warsaw University of Technology, 00-662 Warsaw, Poland; wioleta.slubowska@pw.edu.pl (W.Ś.); jan.nowinski@pw.edu.pl (J.L.N.)

<sup>2</sup> Faculty of Materials Science and Engineering, Warsaw University of Technology, 02-507 Warsaw, Poland; agnieszka.krawczynska@pw.edu.pl

<sup>3</sup> National Research Council, The Materials Science Institute of Madrid (ICMM CSIC), 28049 Madrid, Spain; isobrado@icmm.csic.es (I.S.); jsanz@icmm.csic.es (J.S.)

\* Correspondence: konrad.kwatek@pw.edu.pl

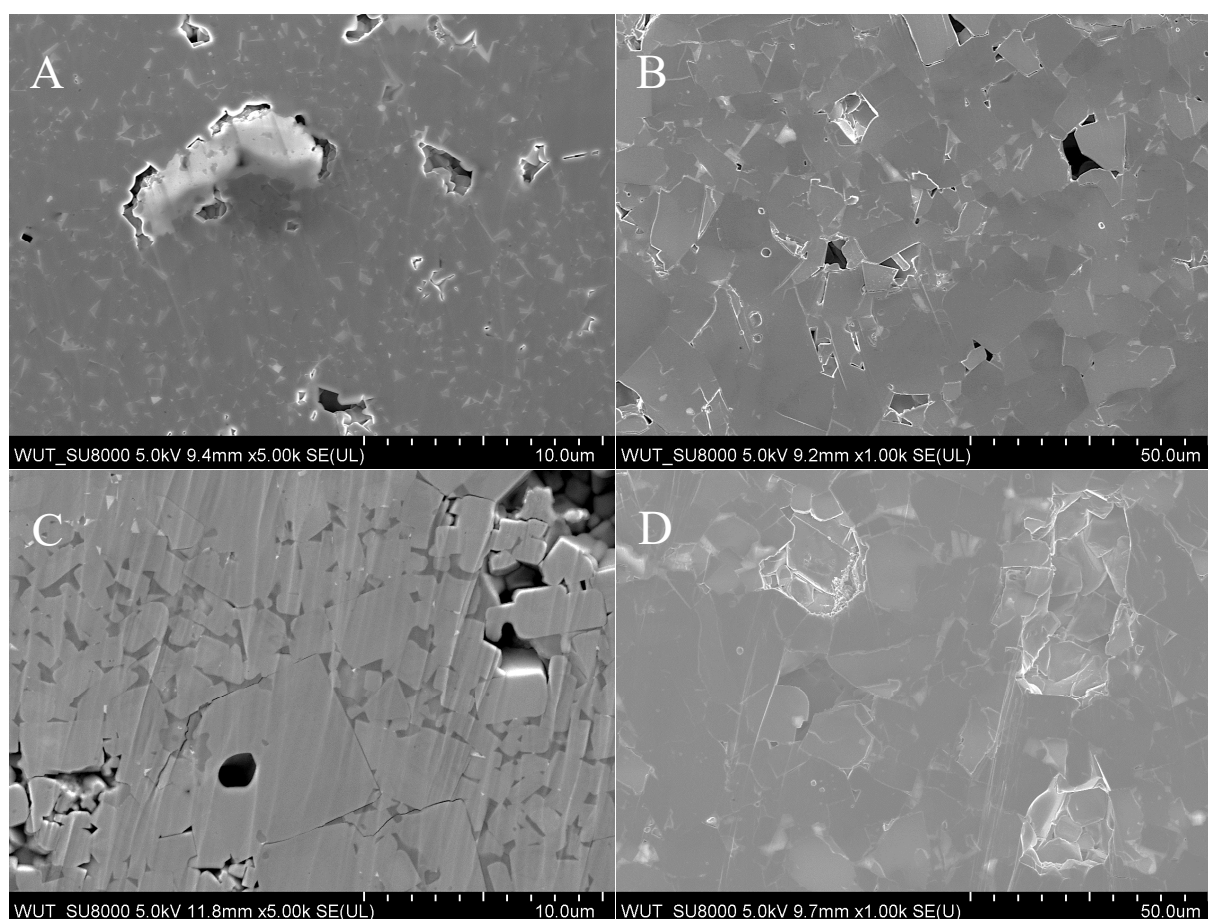

**Figure S1.** SEM images taken in SE mode of the LATP–0.02LSO sintered at 800 °C for 2 h (A) and 1000 °C for 12 h (B), and LATP–0.1LSO sintered at 800 °C for 2 h (C) and 1000 °C for 12 h (D).

**Table S1.** Relative integrated intensities (II) in %, full widths at half maximum height (FWHM) in ppm and isotropic chemical shifts ( $\delta$ ) of the lineshapes used to simulate  $^{27}\text{Al}$  MAS NMR spectra shown in Figure 4 for LATP–0.1LSO sample sintered under different conditions.

| Sintering Conditions | $\text{AlO}_6$ (LATP1) |            |        | $\text{AlO}_6$ (LATP2) |            |        | $\text{AlO}_6$ ( $\text{LiAlP}_2\text{O}_7$ ) |            |        | $\text{AlO}_6$ (U/I Phase) |            |        |
|----------------------|------------------------|------------|--------|------------------------|------------|--------|-----------------------------------------------|------------|--------|----------------------------|------------|--------|
|                      | $\delta$ [ppm]         | FWHM [ppm] | II [%] | $\delta$ [ppm]         | FWHM [ppm] | II [%] | $\delta$ [ppm]                                | FWHM [ppm] | II [%] | $\delta$ [ppm]             | FWHM [ppm] | II [%] |
| 900 °C 2 h           | −14.60                 | 3.18       | 46.9   | −16.30                 | 3.18       | 40.6   | −19.60                                        | 6.40       | 12.5   | –                          | –          | –      |
| 900 °C 6 h           | −14.60                 | 3.16       | 46.3   | −16.30                 | 3.16       | 41.7   | −19.60                                        | 6.40       | 12.0   | –                          | –          | –      |
| 900 °C 12 h          | −14.50                 | 3.16       | 49.6   | −16.24                 | 3.16       | 45.3   | −19.60                                        | 6.40       | 5.1    | –                          | –          | –      |
| 1000 °C 2 h          | −14.70                 | 3.16       | 46.8   | −16.40                 | 3.16       | 43.6   | −19.60                                        | 6.40       | 9.6    | –                          | –          | –      |
| 1000 °C 6 h          | −14.60                 | 3.16       | 48.3   | −16.40                 | 3.16       | 44.0   | −19.60                                        | 6.40       | 7.7    | –                          | –          | –      |
| 1000 °C 12 h         | −14.70                 | 3.12       | 44.9   | −16.40                 | 3.12       | 42.7   | −19.60                                        | 6.40       | 10.7   | −18.90                     | 2.00       | 1.8    |

**Table S2.** Relative integrated intensities (II) in %, full widths at half maximum height (FWHM) in ppm and isotropic chemical shifts ( $\delta$ ) of the lineshapes used to simulate  $^{31}\text{P}$  MAS NMR spectra shown in Figure 5 for LATP–0.1LSO sample sintered under different conditions. Actual (xNMR)  $\text{Al}^{3+}$  concentration in LATP phase is also given along with the nominal one (xNOM).

| sintering conditions | Composition |      | $\text{P}(\text{OTi})_4$ (LATP1) |            |        | $\text{P}(\text{OTi})_3(\text{OAl})_1$ |            |        | $\text{P}(\text{OTi})_2(\text{OAl})_2$ |            |        | $\text{P}(\text{OTi})_1(\text{OAl})_3$ |            |        |
|----------------------|-------------|------|----------------------------------|------------|--------|----------------------------------------|------------|--------|----------------------------------------|------------|--------|----------------------------------------|------------|--------|
|                      | xNOM        | xNMR | $\delta$ [ppm]                   | FWHM [ppm] | II [%] | $\delta$ [ppm]                         | FWHM [ppm] | II [%] | $\delta$ [ppm]                         | FWHM [ppm] | II [%] | $\delta$ [ppm]                         | FWHM [ppm] | II [%] |
| 900 °C 2 h           | 0.30        | 0.32 | −27.70                           | 1.40       | 34.7   | −26.38                                 | 1.40       | 20.8   | −25.18                                 | 1.40       | 7.3    | −23.90                                 | 1.40       | 1.5    |
| 900 °C 6 h           | 0.30        | 0.31 | −27.70                           | 1.40       | 34.4   | −26.40                                 | 1.40       | 20.7   | −25.18                                 | 1.40       | 7.2    | −23.95                                 | 1.40       | 1.3    |
| 900 °C 12 h          | 0.30        | 0.34 | −27.70                           | 1.40       | 32.9   | −26.40                                 | 1.40       | 21.8   | −25.14                                 | 1.40       | 7.7    | −23.95                                 | 1.40       | 1.8    |
| 1000 °C 2 h          | 0.30        | 0.34 | −27.80                           | 1.40       | 33.3   | −26.44                                 | 1.40       | 21.5   | −25.16                                 | 1.40       | 8.2    | −23.95                                 | 1.40       | 2.0    |
| 1000 °C 6 h          | 0.30        | 0.36 | −27.80                           | 1.40       | 32.7   | −26.44                                 | 1.40       | 22.2   | −25.16                                 | 1.40       | 8.3    | −23.90                                 | 1.40       | 2.1    |
| 1000 °C 12 h         | 0.30        | 0.38 | −27.82                           | 1.40       | 31.5   | −26.44                                 | 1.40       | 22.9   | −25.16                                 | 1.40       | 8.9    | −23.90                                 | 1.40       | 2.2    |

| sintering conditions | Composition |      | $\text{P}(\text{OTi})_4$ (LATP2) |            |        | $\text{P}(\text{OTi})_3(\text{OAl})_1$ |            |        | $\text{P}(\text{OTi})_2(\text{OAl})_2$ |            |        | $\text{P}(\text{OTi})_1(\text{OAl})_3$ |            |        |
|----------------------|-------------|------|----------------------------------|------------|--------|----------------------------------------|------------|--------|----------------------------------------|------------|--------|----------------------------------------|------------|--------|
|                      | xNOM        | xNMR | $\delta$ [ppm]                   | FWHM [ppm] | II [%] | $\delta$ [ppm]                         | FWHM [ppm] | II [%] | $\delta$ [ppm]                         | FWHM [ppm] | II [%] | $\delta$ [ppm]                         | FWHM [ppm] | II [%] |
| 900 °C 2 h           | 0.30        | 0.32 | −28.08                           | 1.00       | 14.7   | −27.02                                 | 1.00       | 6.9    | −25.70                                 | 1.00       | 3.3    | −24.45                                 | 1.00       | 1.5    |
| 900 °C 6 h           | 0.30        | 0.31 | −28.10                           | 1.00       | 16.0   | −27.06                                 | 1.00       | 7.3    | −25.75                                 | 1.00       | 3.2    | −24.45                                 | 1.00       | 1.5    |
| 900 °C 12 h          | 0.30        | 0.34 | −28.07                           | 1.00       | 13.9   | −27.06                                 | 1.00       | 7.3    | −25.75                                 | 1.00       | 3.4    | −24.45                                 | 1.00       | 1.6    |
| 1000 °C 2 h          | 0.30        | 0.34 | −28.15                           | 1.00       | 14.1   | −27.10                                 | 1.00       | 8.1    | −25.74                                 | 1.00       | 3.2    | −24.45                                 | 1.00       | 1.5    |
| 1000 °C 6 h          | 0.30        | 0.36 | −28.15                           | 1.00       | 12.9   | −27.12                                 | 1.00       | 8.1    | −25.74                                 | 1.00       | 3.4    | −24.45                                 | 1.00       | 1.6    |
| 1000 °C 12 h         | 0.30        | 0.38 | −28.18                           | 1.00       | 11.5   | −27.14                                 | 1.00       | 8.2    | −25.74                                 | 1.00       | 3.4    | −24.45                                 | 1.00       | 1.8    |

| sintering conditions | $\text{LiAlP}_2\text{O}_7$ |            |        | $\text{LiTiPO}_5$ |            |        | $\text{Li}_4\text{P}_2\text{O}_7$ (Triclinic) |            |        | $\text{Li}_4\text{P}_2\text{O}_7$ (Triclinic) |            |        |
|----------------------|----------------------------|------------|--------|-------------------|------------|--------|-----------------------------------------------|------------|--------|-----------------------------------------------|------------|--------|
|                      | $\delta$ [ppm]             | FWHM [ppm] | II [%] | $\delta$ [ppm]    | FWHM [ppm] | II [%] | $\delta$ [ppm]                                | FWHM [ppm] | II [%] | $\delta$ [ppm]                                | FWHM [ppm] | II [%] |
| 900 °C 2 h           | −23.05                     | 2.80       | 2.7    | −10.25            | 1.01       | 5.6    | −6.35                                         | 0.70       | 0.6    | −4.05                                         | 0.70       | 0.6    |
| 900 °C 6 h           | −23.10                     | 2.80       | 2.3    | −10.20            | 0.75       | 5.5    | −6.35                                         | 0.60       | 0.4    | −4.05                                         | 0.60       | 0.4    |
| 900 °C 12 h          | −23.00                     | 2.80       | 2.8    | −10.20            | 0.75       | 6.0    | −6.35                                         | 0.67       | 0.4    | −4.05                                         | 0.67       | 0.4    |
| 1000 °C 2 h          | −23.10                     | 2.80       | 2.8    | −10.20            | 0.92       | 4.7    | −6.35                                         | 0.60       | 0.3    | −4.05                                         | 0.60       | 0.3    |
| 1000 °C 6 h          | −23.00                     | 2.80       | 3.5    | −10.27            | 0.92       | 4.8    | −6.50                                         | 0.60       | 0.3    | −4.20                                         | 0.60       | 0.3    |
| 1000 °C 12 h         | −23.00                     | 2.80       | 3.8    | −10.27            | 0.80       | 5.3    | −6.50                                         | 0.60       | 0.2    | −4.20                                         | 0.60       | 0.2    |

**Table S3.** Relative integrated intensities (II) in %, full widths at half maximum height (FWHM) in ppm and isotropic chemical shifts ( $\delta$ ) of the lineshapes used to simulate the  $^6\text{Li}$  MAS NMR spectra shown in Figure 6 for LATP-0.1LSO sample sintered under different conditions.

| sintering conditions | Li1 (LATP)     |              |        | Li3 (LATP)     |            |        | LiTiPO <sub>5</sub> |            |        | LiAlP <sub>2</sub> O <sub>7</sub> |            |        | U/I Phase      |            |        |
|----------------------|----------------|--------------|--------|----------------|------------|--------|---------------------|------------|--------|-----------------------------------|------------|--------|----------------|------------|--------|
|                      | $\delta$ [ppm] | FWHM M [ppm] | II [%] | $\delta$ [ppm] | FWHM [ppm] | II [%] | $\delta$ [ppm]      | FWHM [ppm] | II [%] | $\delta$ [ppm]                    | FWHM [ppm] | II [%] | $\delta$ [ppm] | FWHM [ppm] | II [%] |
| 900 °C 2 h           | −0.82          | 0.60         | 10.8   | −0.54          | 3.65       | 78.2   | −0.20               | 0.75       | 2.6    | −1.20                             | 1.10       | 8.5    | –              | –          | –      |
| 900 °C 6 h           | −0.87          | 0.55         | 10.2   | −0.68          | 3.50       | 78.7   | −0.20               | 0.75       | 2.7    | −1.40                             | 1.30       | 8.5    | –              | –          | –      |
| 900 °C 12 h          | −0.87          | 0.50         | 11.5   | −0.74          | 3.40       | 76.9   | −0.1                | 0.60       | 3.7    | −1.35                             | 1.20       | 7.9    | –              | –          | –      |
| 1000 °C 2 h          | −0.89          | 0.50         | 11.6   | −0.74          | 3.00       | 76.3   | −0.05               | 0.50       | 3.7    | −1.35                             | 1.20       | 7.5    | −0.55          | 0.40       | 0.9    |
| 1000 °C 6 h          | −0.89          | 0.50         | 11.4   | −0.72          | 3.10       | 78.2   | 0.00                | 0.35       | 2.3    | −1.35                             | 1.20       | 7.4    | −0.38          | 0.30       | 0.7    |
| 1000 °C 12 h         | −0.89          | 0.50         | 11.0   | −0.70          | 3.10       | 76.8   | 0.04                | 0.50       | 3.7    | −1.35                             | 1.20       | 7.5    | −0.35          | 0.40       | 1.0    |

**Table S4.** Values of bulk ( $\sigma_{gr}$ ) and total ( $\sigma_{tot}$ ) ionic conductivities at 30°C as well as the bulk ( $E_{gr}$ ) and total ( $E_{tot}$ ) activation energies.

| Composition  | Sintering Conditions | $\sigma_{gr}$ (30°C) [S·cm <sup>−1</sup> ] | $\sigma_{tot}$ (30°C) [S·cm <sup>−1</sup> ] | $E_{gr}$ [eV] | $E_{tot}$ [eV] |
|--------------|----------------------|--------------------------------------------|---------------------------------------------|---------------|----------------|
| LATP-0.02LSO | 800 °C 2 h           | $1.4 \times 10^{-4}$                       | $1.3 \times 10^{-5}$                        | 0.34          | 0.44           |
|              | 800 °C 6 h           | $3.6 \times 10^{-4}$                       | $4.2 \times 10^{-5}$                        | 0.34          | 0.44           |
|              | 800 °C 12 h          | $2.8 \times 10^{-4}$                       | $2.6 \times 10^{-5}$                        | 0.34          | 0.44           |
|              | 900 °C 2 h           | $1.8 \times 10^{-4}$                       | $1.5 \times 10^{-5}$                        | 0.34          | 0.44           |
|              | 900 °C 6 h           | $3.1 \times 10^{-4}$                       | $3.3 \times 10^{-5}$                        | 0.35          | 0.44           |
|              | 900 °C 12 h          | $2.6 \times 10^{-4}$                       | $2.6 \times 10^{-5}$                        | 0.35          | 0.44           |
|              | 1000 °C 2 h          | $2.7 \times 10^{-4}$                       | $2.1 \times 10^{-5}$                        | 0.35          | 0.44           |
|              | 1000 °C 6 h          | $2.1 \times 10^{-4}$                       | $1.7 \times 10^{-5}$                        | 0.34          | 0.43           |
|              | 1000 °C 12 h         | $2.5 \times 10^{-4}$                       | $3.5 \times 10^{-5}$                        | 0.35          | 0.43           |

| Composition  | Sintering Conditions | $\sigma_{gr}$ (30°C) [S·cm <sup>−1</sup> ] | $\sigma_{tot}$ (30°C) [S·cm <sup>−1</sup> ] | $E_{gr}$ [eV] | $E_{tot}$ [eV] |
|--------------|----------------------|--------------------------------------------|---------------------------------------------|---------------|----------------|
| LATP-0.05LSO | 800 °C 2 h           | $6.9 \times 10^{-4}$                       | $1.2 \times 10^{-4}$                        | 0.31          | 0.40           |
|              | 800 °C 6 h           | $5.2 \times 10^{-4}$                       | $8.6 \times 10^{-5}$                        | 0.32          | 0.40           |
|              | 800 °C 12 h          | $4.4 \times 10^{-4}$                       | $5.3 \times 10^{-5}$                        | 0.31          | 0.40           |
|              | 900 °C 2 h           | $5.3 \times 10^{-4}$                       | $9.0 \times 10^{-5}$                        | 0.31          | 0.39           |
|              | 900 °C 6 h           | $7.2 \times 10^{-4}$                       | $1.1 \times 10^{-4}$                        | 0.30          | 0.38           |
|              | 900 °C 12 h          | $6.1 \times 10^{-4}$                       | $1.1 \times 10^{-4}$                        | 0.31          | 0.38           |
|              | 1000 °C 2 h          | $4.9 \times 10^{-4}$                       | $8.2 \times 10^{-5}$                        | 0.29          | 0.38           |
|              | 1000 °C 6 h          | $5.2 \times 10^{-4}$                       | $8.5 \times 10^{-5}$                        | 0.29          | 0.39           |
|              | 1000 °C 12 h         | $5.0 \times 10^{-4}$                       | $9.3 \times 10^{-5}$                        | 0.30          | 0.39           |

| Composition | Sintering Conditions | $\sigma_{gr}$ (30°C) [S·cm <sup>−1</sup> ] | $\sigma_{tot}$ (30°C) [S·cm <sup>−1</sup> ] | $E_{gr}$ [eV] | $E_{tot}$ [eV] |
|-------------|----------------------|--------------------------------------------|---------------------------------------------|---------------|----------------|
| LATP-0.1LSO | 800 °C 2 h           | $7.9 \times 10^{-4}$                       | $1.4 \times 10^{-4}$                        | 0.31          | 0.39           |
|             | 800 °C 6 h           | $5.8 \times 10^{-4}$                       | $1.2 \times 10^{-4}$                        | 0.31          | 0.40           |
|             | 800 °C 12 h          | $5.7 \times 10^{-4}$                       | $1.1 \times 10^{-4}$                        | 0.30          | 0.39           |
|             | 900 °C 2 h           | $5.7 \times 10^{-4}$                       | $1.1 \times 10^{-4}$                        | 0.30          | 0.39           |
|             | 900 °C 6 h           | $5.2 \times 10^{-4}$                       | $1.1 \times 10^{-4}$                        | 0.29          | 0.38           |
|             | 900 °C 12 h          | $5.0 \times 10^{-4}$                       | $9.8 \times 10^{-5}$                        | 0.29          | 0.38           |
|             | 1000 °C 2 h          | $5.5 \times 10^{-4}$                       | $1.3 \times 10^{-4}$                        | 0.29          | 0.38           |

---

|  |              |                      |                      |      |      |
|--|--------------|----------------------|----------------------|------|------|
|  | 1000 °C 6 h  | $5.2 \times 10^{-4}$ | $1.4 \times 10^{-4}$ | 0.29 | 0.37 |
|  | 1000 °C 12 h | $4.8 \times 10^{-4}$ | $1.2 \times 10^{-4}$ | 0.29 | 0.38 |

---
